# Supplementary material for: Using structural modularity in cocrystals to engineer properties: elasticity
Source: Royal Society of Chemistry journal article supplement (doi:10.1039/c6cc03226e), 2016-01-01
Supplement: c6cc03226e1.pdf [file c6cc03226e1.pdf]

## Using Structural Modularity in Cocrystals to Engineer Properties: Elasticity

Subhankar Saha and Gautam R. Desiraju\*

Solid State and Structural Chemistry Unit, Indian Institute of Science, Bangalore 560 012,  
India

E-mail: [desiraju@sscu.iisc.ernet.in](mailto:desiraju@sscu.iisc.ernet.in)

### Supporting Information

#### List of contents

- S1: Some representative synthons in brittle 4, 4'-bipyridine and pyrazine
- S2: DSC diagrams and melting points of the cocrystals **E1-E5**
- S3: SCXRD experiment
- S4: Crystallographic information table
- S5: Face indexing images of elastic cocrystals **E1-E5**
- S6: Crystal packing and some significant synthons in **E1-E5**
- S7: Crystal structure description of **E2-E5**
- S8: Attached the video of **E1**.
- S9: Attached the video of **E3**.

**S1: Some representative synthons in brittle 4, 4'-bipyridine and pyrazine**

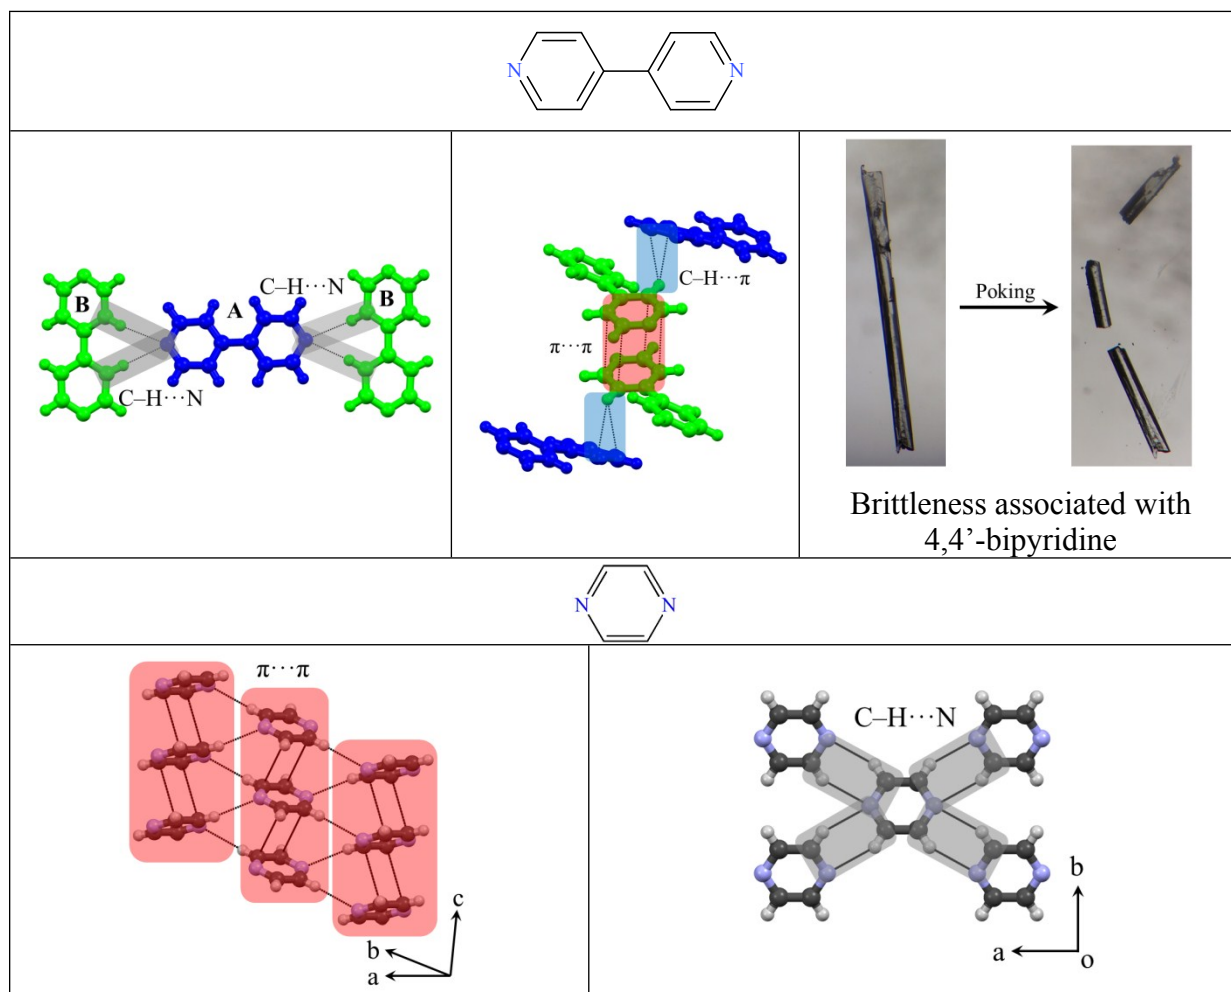

Brittleness associated with 4,4'-bipyridine

## S2: DSC diagrams and melting points of the cocrystals E1-E5

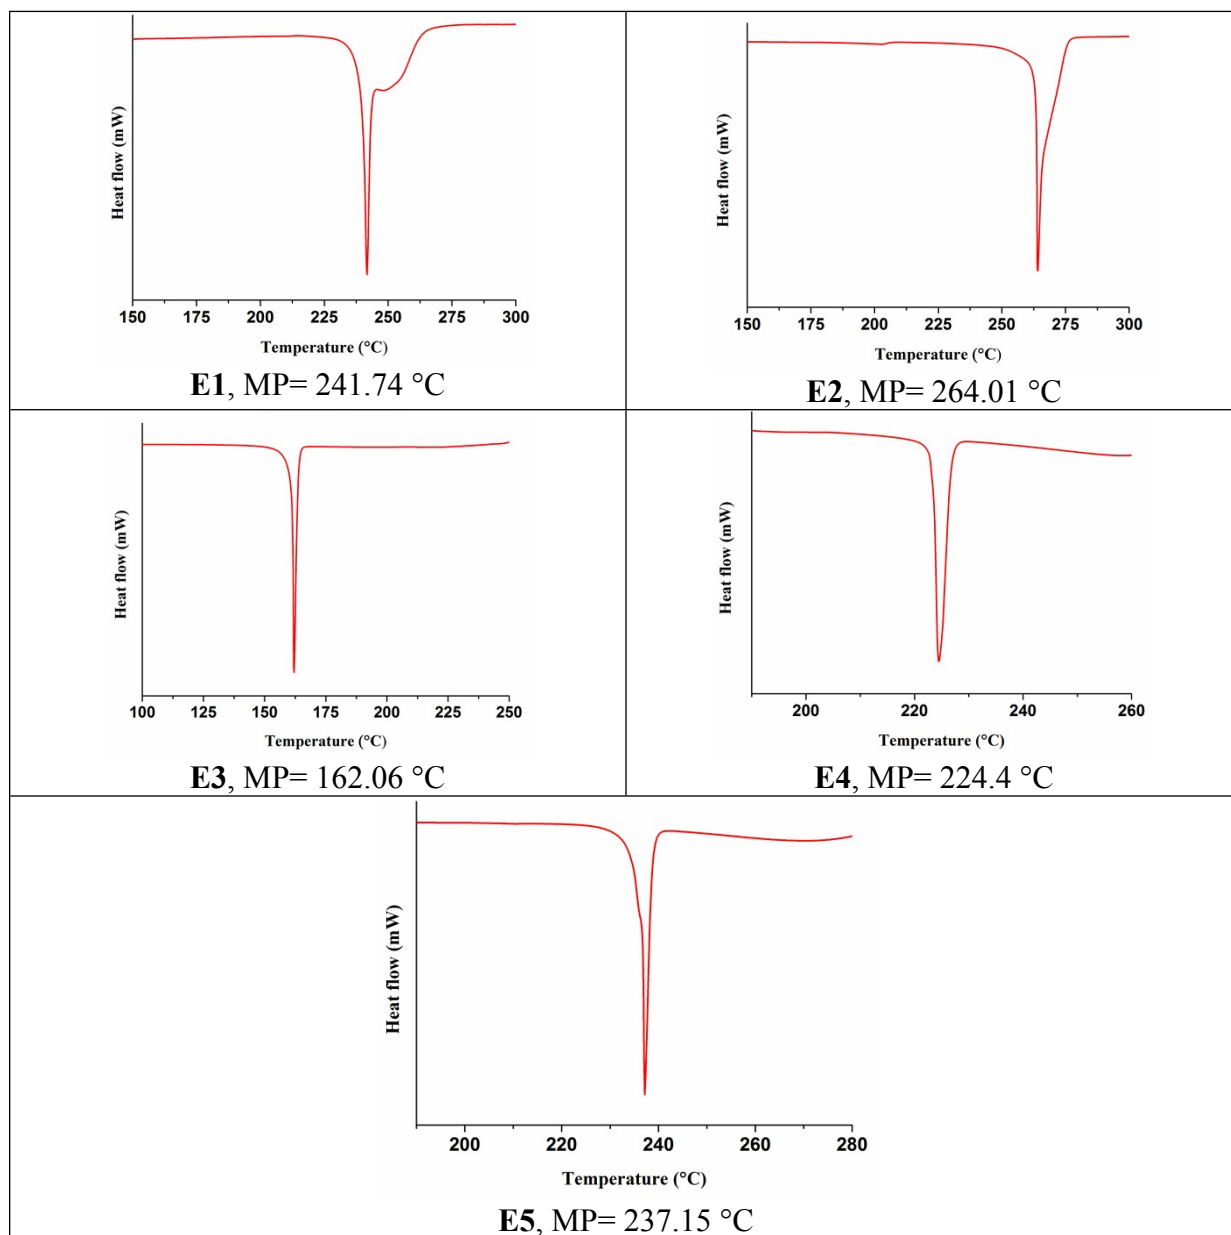

## S3: SCXRD experiment

Single crystal x-ray data (SCXRD) were collected on a Rigaku Mercury 375R/M CCD (XtaLAB mini) diffractometer using graphite monochromatic Mo K $\alpha$  radiation, with a Rigaku low temperature gas spray cooler. Data were processed with the Rigaku *CrystalClear* 2.0 software.<sup>1,2</sup> Structure solution and refinements were performed using SHELX97<sup>3</sup> implemented in the WinGXsuite.<sup>4</sup>

#### S4: Crystallographic information table

| Compounds                                 | E1                                                                                                                  | E2                                                                                                                  | E3                                                                                                      | E4                                                                                                                  | E5                                                                                                                 |
|-------------------------------------------|---------------------------------------------------------------------------------------------------------------------|---------------------------------------------------------------------------------------------------------------------|---------------------------------------------------------------------------------------------------------|---------------------------------------------------------------------------------------------------------------------|--------------------------------------------------------------------------------------------------------------------|
| Formula                                   | 0.5(C <sub>10</sub> H <sub>8</sub> N <sub>2</sub> ),<br>C <sub>7</sub> H <sub>4</sub> I <sub>2</sub> O <sub>3</sub> | C <sub>10</sub> H <sub>8</sub> N <sub>2</sub> ,<br>2(C <sub>7</sub> H <sub>4</sub> Cl <sub>2</sub> O <sub>3</sub> ) | 0.5(C <sub>10</sub> H <sub>8</sub> N <sub>2</sub> ),<br>C <sub>6</sub> H <sub>4</sub> Br <sub>2</sub> O | 0.5(C <sub>4</sub> H <sub>4</sub> N <sub>2</sub> ),<br>C <sub>7</sub> H <sub>4</sub> Cl <sub>2</sub> O <sub>3</sub> | 0.5(C <sub>4</sub> H <sub>4</sub> N <sub>2</sub> ),<br>C <sub>7</sub> H <sub>4</sub> I <sub>2</sub> O <sub>3</sub> |
| Formula weight                            | 467.99                                                                                                              | 570.19                                                                                                              | 329.985                                                                                                 | 247.05                                                                                                              | 429.95                                                                                                             |
| Crystal system                            | Monoclinic                                                                                                          | Triclinic                                                                                                           | Triclinic                                                                                               | Triclinic                                                                                                           | Monoclinic                                                                                                         |
| Space group                               | <i>C</i> 2/ <i>c</i>                                                                                                | <i>P</i> 1                                                                                                          | <i>P</i> 1                                                                                              | <i>P</i> 1                                                                                                          | <i>C</i> 2/ <i>c</i>                                                                                               |
| <i>a</i> (Å)                              | 17.60(3)                                                                                                            | 3.795(9)                                                                                                            | 4.183(3)                                                                                                | 3.803(5)                                                                                                            | 27.78(3)                                                                                                           |
| <i>b</i> (Å)                              | 4.372(6)                                                                                                            | 14.70(3)                                                                                                            | 8.769(7)                                                                                                | 10.407(12)                                                                                                          | 4.706(4)                                                                                                           |
| <i>c</i> (Å)                              | 34.30(5)                                                                                                            | 21.40(5)                                                                                                            | 15.366(12)                                                                                              | 13.414(16)                                                                                                          | 17.566(16)                                                                                                         |
| $\alpha$ (°)                              | 90                                                                                                                  | 80.70(5)                                                                                                            | 94.10(3)                                                                                                | 68.67(4)                                                                                                            | 90                                                                                                                 |
| $\beta$ (°)                               | 97.444(15)                                                                                                          | 89.35(6)                                                                                                            | 95.78(3)                                                                                                | 85.89(4)                                                                                                            | 96.051(8)                                                                                                          |
| $\gamma$ (°)                              | 90                                                                                                                  | 89.09(5)                                                                                                            | 99.68(3)                                                                                                | 80.72(4)                                                                                                            | 90                                                                                                                 |
| <i>V</i> (Å <sup>3</sup> )                | 2617(6)                                                                                                             | 1178(5)                                                                                                             | 550.5(7)                                                                                                | 488.0(11)                                                                                                           | 2284(4)                                                                                                            |
| <i>Z</i>                                  | 8                                                                                                                   | 2                                                                                                                   | 1                                                                                                       | 2                                                                                                                   | 8                                                                                                                  |
| $\rho_{\text{calc}}$ (g/cm <sup>3</sup> ) | 2.375                                                                                                               | 1.608                                                                                                               | 1.991                                                                                                   | 1.681                                                                                                               | 2.501                                                                                                              |
| F(000)                                    | 1736.0                                                                                                              | 580.0                                                                                                               | 318.0                                                                                                   | 250.0                                                                                                               | 1576.0                                                                                                             |
| Temp. (K)                                 | 173 K                                                                                                               | 173 K                                                                                                               | 173 K                                                                                                   | 173 K                                                                                                               | 293 K                                                                                                              |
| <i>R</i> <sub><i>I</i></sub>              | 0.0666                                                                                                              | 0.0975                                                                                                              | 0.0560                                                                                                  | 0.0450                                                                                                              | 0.0416                                                                                                             |
| <i>wR</i> <sub>2</sub>                    | 0.2193                                                                                                              | 0.2997                                                                                                              | 0.1890                                                                                                  | 0.1535                                                                                                              | 0.1531                                                                                                             |
| Goodness-of fit                           | 1.117                                                                                                               | 1.098                                                                                                               | 1.150                                                                                                   | 1.164                                                                                                               | 1.178                                                                                                              |
| CCDC No.                                  | 1472664                                                                                                             | 1472665                                                                                                             | 1472666                                                                                                 | 1472667                                                                                                             | 1472668                                                                                                            |

#### S5: Face indexing images of elastic cocrystals E1-E5

| Cocrystal | Crystal image                                                                       | Indexed faces                                                                         |
|-----------|-------------------------------------------------------------------------------------|---------------------------------------------------------------------------------------|
| E1        | 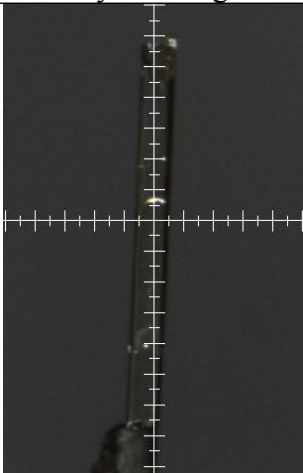 |  |

|                  |                                                                                     |                                                                                       |
|------------------|-------------------------------------------------------------------------------------|---------------------------------------------------------------------------------------|
| <p><b>E2</b></p> |    |    |
| <p><b>E3</b></p> |   |   |
| <p><b>E4</b></p> |  |  |
| <p><b>E5</b></p> |  |  |

## S6: Crystal packing and some significant synthons in E1-E5

| Crystal packing                                                                                                                                                                                    | Significant interactions                                                                                                                                                                                                                        |
|----------------------------------------------------------------------------------------------------------------------------------------------------------------------------------------------------|-------------------------------------------------------------------------------------------------------------------------------------------------------------------------------------------------------------------------------------------------|
| 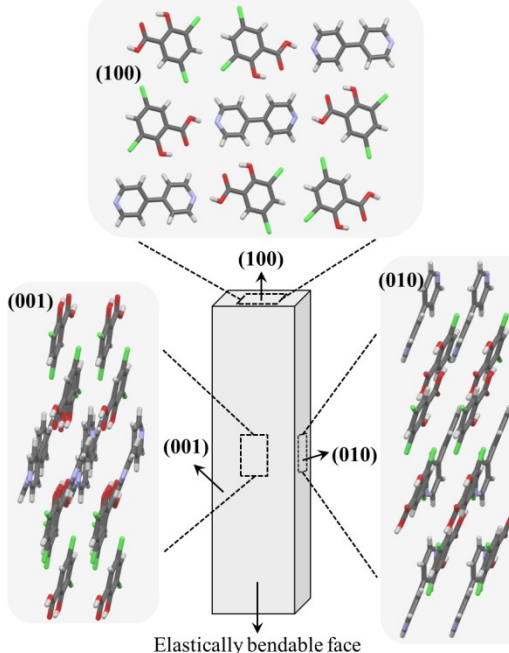 <p>(100)</p> <p>(001)</p> <p>(010)</p> <p>(100)</p> <p>(001)</p> <p>(010)</p> <p>Elastically bendable face</p>   |  <p>Capped units</p> <p><math>\text{Cl} \cdots \text{Cl}</math> type-II synthons</p> <p><math>\pi \cdots \pi</math></p> <p>a</p> <p>b</p> <p>c</p> <p>o</p>   |
|  <p>(100)</p> <p>(001)</p> <p>(010)</p> <p>(100)</p> <p>(001)</p> <p>(010)</p> <p>Elastically bendable face</p> |  <p>Capped units</p> <p><math>\text{Br} \cdots \text{Br}</math> type-II synthons</p> <p><math>\pi \cdots \pi</math></p> <p>a</p> <p>b</p> <p>c</p> <p>o</p> |
| <b>E3</b>                                                                                                                                                                                          |                                                                                                                                                                                                                                                 |

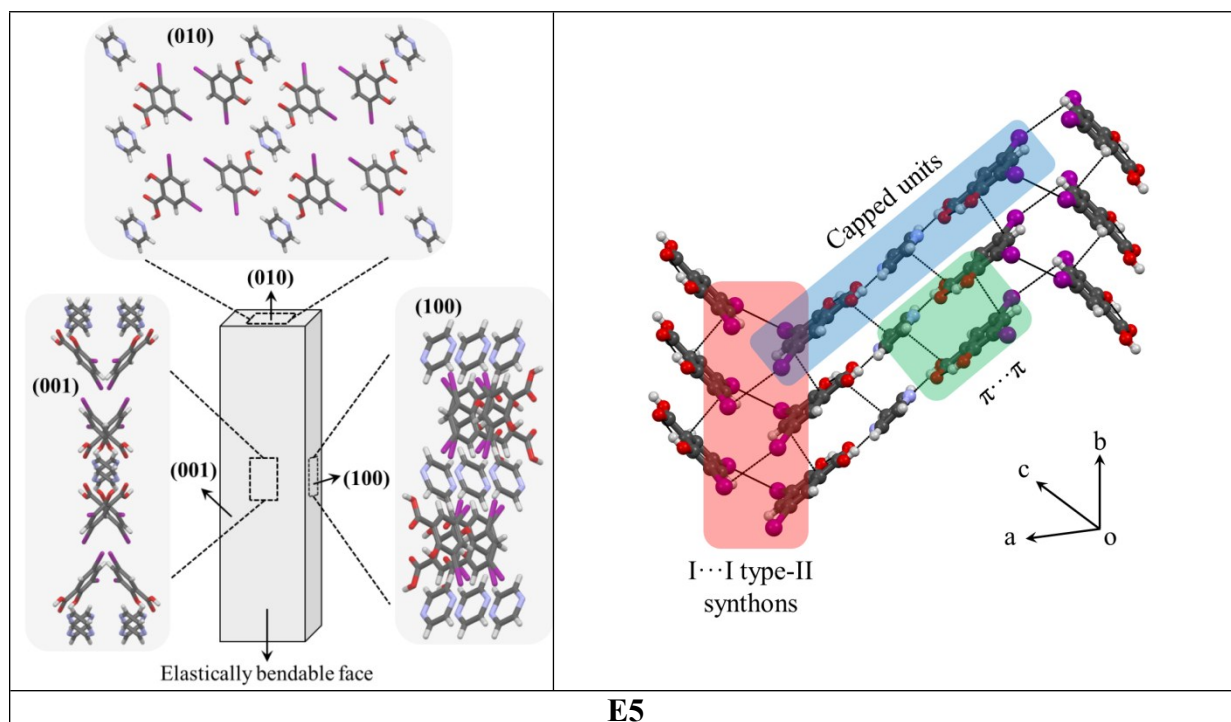

### S7: Crystal structure description of E2-E5

The 1:2 bipyridine–3,5-dichlorosalicylic acid cocrystal **E2** crystallizes in the  $P\bar{1}$  space group with  $Z'=1$ . The acid $\cdots$ pyridine (1.74 Å; 1.75 Å) contact based capped units are arranged along the  $a$ -axis via  $\pi\cdots\pi$  (3.47 Å) interactions to form the columns (ESI, S6). The Cl $\cdots$ Cl (3.68 Å,  $\theta_1=85.6^\circ$ ,  $\theta_2=128.6^\circ$ ; 3.88 Å,  $\theta_1=86.6^\circ$ ,  $\theta_2=127.6^\circ$ ) type-II halogen bonds connect the columns to generate parallel chains along  $[01\bar{1}]$ . These parallel chains are linked through C–H $\cdots$ O (2.69 Å; 2.80 Å), C–H $\cdots$ Cl (3.04 Å; 3.02 Å) and C–Cl $\cdots$ O (3.30 Å) interactions. This molecular organisation in **E2** is similar to that in **E1**.

The 1:2 cocrystal **E3** is composed of 4,4'-bipyridine and 3,5-dibromophenol ( $P\bar{1}$ ,  $Z'=0.5$ ). The phenol $\cdots$ pyridine (1.92 Å) synthons result in capped units which stack (3.55 Å) along the  $a$ -axis (see ESI). These stacked columns form Br $\cdots$ Br (4.00 Å,  $\theta_1=77.2^\circ$ ,  $\theta_2=121.8^\circ$ ; 3.56 Å,  $\theta_1=113.4^\circ$ ,  $\theta_2=169.5^\circ$ ) type-II halogen bonds along  $[001]$  and  $[010]$ . There are also exist some supportive C–H $\cdots$ O (2.79 Å) interactions. The similar structural pattern of this cocrystal suggests that phenols too might be good candidates in capping based design.

The 1:2 base-acid cocrystal **E4** crystallizes in the triclinic space group  $P\bar{1}$  with  $Z'=0.5$  (Figure 6). Each pyrazine molecule is capped with the acid at both ends (1.88 Å) and the capped units are organised through  $\pi\cdots\pi$  (3.37 Å) interactions along the  $a$ -axis to form stacked columns which are interconnected via dimeric Cl $\cdots$ Cl (3.6 Å,  $\theta_1=88.5^\circ$ ,  $\theta_2=124.6^\circ$ ) type-II halogen bonds along the  $[012]$  direction, generating infinite parallel chains. Adjacent chains are connected with C–H $\cdots$ O (2.42 Å), C–H $\cdots$ Cl (2.87

Å) and C–Cl $\cdots$ O (3.30 Å) interactions. The packing is very similar to the earlier cocrystals and demonstrates the generality of the design strategy.

In the 1:2 cocrystal **E5** (*C2/c*, *Z'*=0.5) similar capping is seen (acid $\cdots$ pyridine, 1.79 Å; ESI, S6). The  $\pi\cdots\pi$  stacked columns of capped units (3.16 Å) are directed along the unique axis *b*. The halogen bonds (4.00 Å, 74°, 153°) along [201] connect neighbouring columns leading to parallel tapes which associate with C–H $\cdots$ O (2.57 Å) and C–I $\cdots$ O (3.58 Å) interactions. The structure is isotropic. In summary, the similar molecular arrangements in all cocrystals, **E1** to **E5**, which is according to the design strategy outlined in the main paper is very encouraging for a targeted property like elasticity.

## References

1. Crystal Clear 2.0 (Rigaku Corporation: Tokyo).
2. J. Pflugrath, *Acta Crystallogr., Sect. D: Biol. Crystallogr.*, 1999, **55**, 1718–1725.
3. G. M. Sheldrick, SHELX-97: Program for the Solution and Refinement of Crystal Structures 1997 (University of Göttingen: Göttingen).
4. L. J. Farrugia, *J. Appl. Crystallogr.*, 1999, **32**, 837–838.
